# Supplementary material for: Influencing factors and mediating mechanisms of job crafting in clinical nursing practice
Source: Front Public Health. 2025 Dec 18;13:1711339. doi: 10.3389/fpubh.2025.1711339 (PMC12756456; doi:10.3389/fpubh.2025.1711339)
Supplement: Supplementary file 3 [file Supplementary_file_3.docx]

***Supplementary File 3***

Table 1 Pearson correlation analysis

|  | 1 | 2 | 3 | 4 | 5 | 6 | 7 | 8 | 9 | 10 | 11 | 12 | 13 | 14 | 15 | 16 | 17 | 18 | 19 |
| --- | --- | --- | --- | --- | --- | --- | --- | --- | --- | --- | --- | --- | --- | --- | --- | --- | --- | --- | --- |
| 1 Task Crafting | 1 |  |  |  |  |  |  |  |  |  |  |  |  |  |  |  |  |  |  |
| 2 Cognitive Crafting | 0.780** | 1 |  |  |  |  |  |  |  |  |  |  |  |  |  |  |  |  |  |
| 3 Relationship Crafting | 0.754** | 0.882** | 1 |  |  |  |  |  |  |  |  |  |  |  |  |  |  |  |  |
| 4 Promotion Focus | 0.570** | 0.723** | 0.736** | 1 |  |  |  |  |  |  |  |  |  |  |  |  |  |  |  |
| 5 Prevention Focus | 0.638** | 0.774** | 0.772** | 0.909** | 1 |  |  |  |  |  |  |  |  |  |  |  |  |  |  |
| 6 Self-Efficacy | 0.661** | 0.749** | 0.749** | 0.798** | 0.839** | 1 |  |  |  |  |  |  |  |  |  |  |  |  |  |
| 7 Hope | 0.651** | 0.716** | 0.732** | 0.783** | 0.810** | 0.920** | 1 |  |  |  |  |  |  |  |  |  |  |  |  |
| 8 Resilience | 0.640** | 0.724** | 0.723** | 0.791** | 0.822** | 0.918** | 0.941** | 1 |  |  |  |  |  |  |  |  |  |  |  |
| 9 Optimism | 0.632** | 0.702** | 0.678** | 0.739** | 0.789** | 0.880** | 0.912** | 0.907** | 1 |  |  |  |  |  |  |  |  |  |  |
| 10 Extraversion | 0.544** | 0.568** | 0.561** | 0.548** | 0.605** | 0.668** | 0.687** | 0.672** | 0.657** | 1 |  |  |  |  |  |  |  |  |  |
| 11 Agreeableness | 0.459** | 0.417** | 0.429** | 0.377** | 0.428** | 0.505** | 0.516** | 0.508** | 0.498** | 0.693** | 1 |  |  |  |  |  |  |  |  |
| 12 Conscientiousness | 0.411** | 0.383** | 0.384** | 0.392** | 0.427** | 0.474** | 0.482** | 0.482** | 0.458** | 0.675** | 0.762** | 1 |  |  |  |  |  |  |  |
| 13 Emotional Stability | 0.364** | 0.369** | 0.372** | 0.354** | 0.386** | 0.424** | 0.426** | 0.440** | 0.386** | 0.631** | 0.787** | 0.749** | 1 |  |  |  |  |  |  |
| 14 Openness | 0.425** | 0.455** | 0.468** | 0.476** | 0.503** | 0.543** | 0.564** | 0.568** | 0.544** | 0.679** | 0.700** | 0.755** | 0.689** | 1 |  |  |  |  |  |
| 15 Job crafting | 0.916** | 0.947** | 0.935** | 0.719** | 0.776** | 0.769** | 0.748** | 0.744** | 0.718** | 0.598** | 0.468** | 0.422** | 0.395** | 0.481** | 1 |  |  |  |  |
| 16 Career Calling | 0.697** | 0.777** | 0.760** | 0.783** | 0.865** | 0.830** | 0.833** | 0.820** | 0.831** | 0.647** | 0.480** | 0.461** | 0.391** | 0.510** | 0.797** | 1 |  |  |  |
| 17 Nurse regulatory focus | 0.619** | 0.767** | 0.772** | 0.976** | 0.978** | 0.839** | 0.816** | 0.826** | 0.782** | 0.591** | 0.412** | 0.419** | 0.379** | 0.501** | 0.766** | 0.844** | 1 |  |  |
| 18 Psychological capital | 0.669** | 0.749** | 0.750** | 0.808** | 0.845** | 0.967** | 0.978** | 0.974** | 0.946** | 0.695** | 0.524** | 0.491** | 0.436** | 0.574** | 0.772** | 0.856** | 0.846** | 1 |  |
| 19 TIPI-C | 0.503** | 0.499** | 0.504** | 0.488** | 0.534** | 0.595** | 0.609** | 0.608** | 0.579** | 0.838** | 0.903** | 0.898** | 0.879** | 0.867** | 0.539** | 0.567** | 0.523** | 0.619** | 1 |

Note: *represents *p* < 0.05, **represents *p* < 0.01.
